# Supplementary material for: Pulsed Field Ablation for Persistent Atrial Fibrillation: Meta-Analysis of Pulmonary Vein Isolation with or without Posterior Wall Isolation
Source: Research Square preprint supplement (doi:10.21203/rs.3.rs-8668217/v1), 2026-02-11
Supplement: Supplementary file 1 [file c6172d0441d5425c8435cb85.docx]

***Supplemental Appendix for:***

**Pulsed Field Ablation for Persistent Atrial Fibrillation: Meta-Analysis of Pulmonary Vein Isolation with or without Posterior Wall Isolation**

**Table of Contents**

**Page 2-5: Supplementary Table S1. PRISMA Checklist.**

**Page 6-9: Supplementary Table S2. The search strategies of this meta-analysis.**

**Page 10-13: Supplementary Table S3. Studies excluded (*n*=25) with reasons.**

**Page 14-15: Supplementary Table S4. Quality Assessment.**

**Page 16: Supplementary Figure S1. Funnel Plot for Atrial Tachyarrhythmia Recurrence.**

**Page 17: Supplementary Figure S2. Egger's Test for Publication Bias.**

**Page 18: Supplementary Figure S3. Galbraith Plot for ATA Recurrence.**

**Page 19: Supplementary Figure S4. Subgroup Analysis Forest Plots: Atrial Arrhythmia Recurrence After PVI+PWI Strategy in 13 Studies.**

**Page 20-21: Supplementary Table S5. The heterogeneity of the included studies through sensitivity analysis - Procedural Characteristics.**

**Supplementary Table S1. PRISMA Checklist.**

| **Section and Topic** | **Item #** | **Checklist item** | **Location where item is reported** |
| --- | --- | --- | --- |
| **TITLE** | | |  |
| Title | 1 | Identify the report as a systematic review. | 1 |
| **ABSTRACT** | | |  |
| Abstract | 2 | See the PRISMA 2020 for Abstracts checklist. | 2 |
| **INTRODUCTION** | | |  |
| Rationale | 3 | Describe the rationale for the review in the context of existing knowledge. | 4-5 |
| Objectives | 4 | Provide an explicit statement of the objective(s) or question(s) the review addresses. | 5 |
| **METHODS** | | |  |
| Eligibility criteria | 5 | Specify the inclusion and exclusion criteria for the review and how studies were grouped for the syntheses. | 5-6 |
| Information sources | 6 | Specify all databases, registers, websites, organisations, reference lists and other sources searched or consulted to identify studies. Specify the date when each source was last searched or consulted. | 5 |
| Search strategy | 7 | Present the full search strategies for all databases, registers and websites, including any filters and limits used. | 5 |
| Selection process | 8 | Specify the methods used to decide whether a study met the inclusion criteria of the review, including how many reviewers screened each record and each report retrieved, whether they worked independently, and if applicable, details of automation tools used in the process. | 6 |
| Data collection process | 9 | Specify the methods used to collect data from reports, including how many reviewers collected data from each report, whether they worked independently, any processes for obtaining or confirming data from study investigators, and if applicable, details of automation tools used in the process. | 6 |
| Data items | 10a | List and define all outcomes for which data were sought. Specify whether all results that were compatible with each outcome domain in each study were sought (e.g. for all measures, time points, analyses), and if not, the methods used to decide which results to collect. | 6 |
| 10b | List and define all other variables for which data were sought (e.g. participant and intervention characteristics, funding sources). Describe any assumptions made about any missing or unclear information. | 6-7 |
| Study risk of bias assessment | 11 | Specify the methods used to assess risk of bias in the included studies, including details of the tool(s) used, how many reviewers assessed each study and whether they worked independently, and if applicable, details of automation tools used in the process. | 7 |
| Effect measures | 12 | Specify for each outcome the effect measure(s) (e.g. risk ratio, mean difference) used in the synthesis or presentation of results. | 7 |
| Synthesis methods | 13a | Describe the processes used to decide which studies were eligible for each synthesis (e.g. tabulating the study intervention characteristics and comparing against the planned groups for each synthesis (item #5)). | 6-7 |
| 13b | Describe any methods required to prepare the data for presentation or synthesis, such as handling of missing summary statistics, or data conversions. | 7 |
| 13c | Describe any methods used to tabulate or visually display results of individual studies and syntheses. | 7 |
| 13d | Describe any methods used to synthesize results and provide a rationale for the choice(s). If meta-analysis was performed, describe the model(s), method(s) to identify the presence and extent of statistical heterogeneity, and software package(s) used. | 7-8 |
| 13e | Describe any methods used to explore possible causes of heterogeneity among study results (e.g. subgroup analysis, meta-regression). | 7-8 |
| 13f | Describe any sensitivity analyses conducted to assess robustness of the synthesized results. | 7-8 |
| Reporting bias assessment | 14 | Describe any methods used to assess risk of bias due to missing results in a synthesis (arising from reporting biases). | 7-8 |
| Certainty assessment | 15 | Describe any methods used to assess certainty (or confidence) in the body of evidence for an outcome. | 7-8 |
| **RESULTS** | | |  |
| Study selection | 16a | Describe the results of the search and selection process, from the number of records identified in the search to the number of studies included in the review, ideally using a flow diagram. | 8 |
| 16b | Cite studies that might appear to meet the inclusion criteria, but which were excluded, and explain why they were excluded. | 8 |
| Study characteristics | 17 | Cite each included study and present its characteristics. | 8-9 |
| Risk of bias in studies | 18 | Present assessments of risk of bias for each included study. | 11 |
| Results of individual studies | 19 | For all outcomes, present, for each study: (a) summary statistics for each group (where appropriate) and (b) an effect estimate and its precision (e.g. confidence/credible interval), ideally using structured tables or plots. | 10-11 |
| Results of syntheses | 20a | For each synthesis, briefly summarise the characteristics and risk of bias among contributing studies. | 8-9 |
| 20b | Present results of all statistical syntheses conducted. If meta-analysis was done, present for each the summary estimate and its precision (e.g. confidence/credible interval) and measures of statistical heterogeneity. If comparing groups, describe the direction of the effect. | 10-11 |
| 20c | Present results of all investigations of possible causes of heterogeneity among study results. | 11 |
| 20d | Present results of all sensitivity analyses conducted to assess the robustness of the synthesized results. | 15 |
| Reporting biases | 21 | Present assessments of risk of bias due to missing results (arising from reporting biases) for each synthesis assessed. | 11 |
| Certainty of evidence | 22 | Present assessments of certainty (or confidence) in the body of evidence for each outcome assessed. | 10-11 |
| **DISCUSSION** | | |  |
| Discussion | 23a | Provide a general interpretation of the results in the context of other evidence. | 11-15 |
| 23b | Discuss any limitations of the evidence included in the review. | 15-16 |
| 23c | Discuss any limitations of the review processes used. | 15-16 |
| 23d | Discuss implications of the results for practice, policy, and future research. | 15-16 |
| **OTHER INFORMATION** | | |  |
| Registration and protocol | 24a | Provide registration information for the review, including register name and registration number, or state that the review was not registered. | 5 |
| 24b | Indicate where the review protocol can be accessed, or state that a protocol was not prepared. | 5 |
| 24c | Describe and explain any amendments to information provided at registration or in the protocol. | 5 |
| Support | 25 | Describe sources of financial or non-financial support for the review, and the role of the funders or sponsors in the review. | 1 |
| Competing interests | 26 | Declare any competing interests of review authors. | 1 |
| Availability of data, code and other materials | 27 | Report which of the following are publicly available and where they can be found: template data collection forms; data extracted from included studies; data used for all analyses; analytic code; any other materials used in the review. | 7,16 |

*From:*  Page MJ, McKenzie JE, Bossuyt PM, Boutron I, Hoffmann TC, Mulrow CD, et al. The PRISMA 2020 statement: an updated guideline for reporting systematic reviews. BMJ 2021;372:n71. doi: 10.1136/bmj.n71. This work is licensed under CC BY 4.0. To view a copy of this license, visit <https://creativecommons.org/licenses/by/4.0/>

**Supplementary Table S2. The search strategies of this meta-analysis**

| **Pubmed (2025/9/12)** | |  |
| --- | --- | --- |
| No. | Query | Results |
| #1 | ("Atrial Fibrillation"[Mesh]) OR ((((((((((((((((((((((((Fibrillation, Atrial[Title/Abstract]) OR (Fibrillations, Atrial[Title/Abstract])) OR (Auricular Fibrillation[Title/Abstract])) OR (Auricular Fibrillations[Title/Abstract])) OR (Fibrillation, Auricular[Title/Abstract])) OR (Fibrillations, Auricular[Title/Abstract])) OR (Persistent Atrial Fibrillation[Title/Abstract])) OR (Atrial Fibrillation, Persistent[Title/Abstract])) OR (Atrial Fibrillations, Persistent[Title/Abstract])) OR (Fibrillation, Persistent Atrial[Title/Abstract])) OR (Fibrillations, Persistent Atrial[Title/Abstract])) OR (Persistent Atrial Fibrillations[Title/Abstract])) OR (Familial Atrial Fibrillation[Title/Abstract])) OR (Atrial Fibrillation, Familial[Title/Abstract])) OR (Atrial Fibrillations, Familial[Title/Abstract])) OR (Familial Atrial Fibrillations[Title/Abstract])) OR (Fibrillation, Familial Atrial[Title/Abstract])) OR (Fibrillations, Familial Atrial[Title/Abstract])) OR (Paroxysmal Atrial Fibrillation[Title/Abstract])) OR (Atrial Fibrillation, Paroxysmal[Title/Abstract])) OR (Atrial Fibrillations, Paroxysmal[Title/Abstract])) OR (Fibrillation, Paroxysmal Atrial[Title/Abstract])) OR (Fibrillations, Paroxysmal Atrial[Title/Abstract])) OR (Paroxysmal Atrial Fibrillations[Title/Abstract])) | 83510 |
| #2 | (((Pulsed field ablation[Title/Abstract]) OR (PFA[Title/Abstract])) OR (Pulsed electric fields[Title/Abstract])) OR (non-thermal ablation[Title/Abstract]) | 5920 |
| #3 | #1 AND #2 | 494 |
| #4 | #3 AND (("2018"[Date - Publication] : "3000"[Date - Publication])) | 490 |
|  |  |  |
| **Embase (2025/9/12)** | |  |
| No. | Query | Results |
| #1 | ‘atrial fibrillation'/de OR (atrial AND fibrillat*) OR (auricular AND fibrillat*) | 281370 |
| #2 | ‘pulsed field ablation'/de OR 'pulsed field ablation' OR pfa OR 'electroporation ablation' OR 'non-thermal ablation' OR 'irreversible electroporation' OR ire | 27525 |
| #3 | #1 AND #2 | 1746 |
| #4 | #3 AND (2018:py OR 2019:py OR 2020:py OR 2021:py OR 2022:py OR 2023:py OR 2024:py OR 2025:py) | 1676 |
|  |  |  |
| **Cochrane library (2025/9/12)** | |  |
| No. | Query | Results |
| #1 | MeSH descriptor: [Atrial Fibrillation] explode all trees | 7519 |
| #2 | (atrial fibrillat*):ti,ab,kw OR (auricular fibrillat*):ti,ab,kw AND (AF):ti,ab,kw | 17711 |
| #3 | #1 OR #2 | 17711 |
| #4 | (pulsed field ablation):ti,ab,kw OR (PFA):ti,ab,kw OR (electroporation ablation):ti,ab,kw OR (non-thermal ablation):ti,ab,kw OR (irreversible electroporation):ti,ab,kw | 643 |
| #5 | #3 AND #5 | 133 |
|  |  |  |
| **Web of Science (2025/9/12)** | |  |
| No. | Query | Results |
| #1 | TS=("atrial fibrillation" OR "atrial fibrillations" OR "auricular fibrillation" OR AF) | 269387 |
| #2 | TS=("pulsed field ablation" OR PFA OR "electroporation ablation" OR "non-thermal ablation" OR "nonthermal ablation" OR "irreversible electroporation" OR IRE) | 29569 |
| #3 | #2 AND #3 | 940 |
| #4 | #3 AND 2018/2025 (Publication Date) | 882 |
|  |  |  |
|  |  |  |
| **CNKI (2025/9/25)** | |  |
| No. | Query | Results |
| #1 | （主题：心房颤动）OR（篇关摘：心房颤动(模糊)）OR（篇关摘：房颤(模糊)）OR（篇关摘：家族性心房颤动(模糊)）OR（篇关摘：心房纤颤(模糊)）OR（篇关摘：心房纤维颤动(模糊)）OR（篇关摘：阵发性心房颤动(模糊)）OR（篇关摘：持续性心房颤动(模糊)） | 23200 |
| #2 | （主题：脉冲电场消融）OR（篇关摘：脉冲电场消融(模糊)）OR（篇关摘：脉冲消融(模糊)）OR（篇关摘：不可逆电穿孔(模糊)）OR（篇关摘：非热消融(模糊)） | 646 |
| #3 | #1 AND #2 | 121 |
|  |  |  |
| **SinoMed (2025/9/25)** | |  |
| No. | Query | Results |
| #1 | ("心房颤动"[标题:智能] OR "心房颤动"[摘要:智能] OR "房颤"[摘要:智能] OR "家族性心房颤动"[摘要:智能] OR "心房纤颤"[摘要:智能] OR "心房纤维颤动"[摘要:智能] OR "阵发性心房颤动"[摘要:智能] OR "持续性心房颤动"[摘要:智能]) AND 2018-2025[日期] | 14803 |
| #2 | ("脉冲电场消融"[标题:智能] OR "脉冲电场消融"[摘要:智能] OR "脉冲消融"[摘要:智能] OR "不可逆电穿孔"[摘要:智能] OR "非热消融"[摘要:智能]) AND 2018-2025[日期] | 188 |
| #3 | #1 AND #2 | 64 |
|  |  |  |
| **Vip (2025/9/25)** | |  |
| No. | Query | Results |
| #1 | ((((((题名或关键词=心房颤动 OR 题名或关键词=房颤) OR 题名或关键词=家族性心房颤动) OR 题名或关键词=心房纤颤) OR 题名或关键词=心房纤维颤动) OR 题名或关键词=阵发性心房颤动) OR 题名或关键词=持续性心房颤动) AND (years:[2018 TO 2025]) | 12143 |
| #2 | (((题名或关键词=脉冲电场消融 OR 题名或关键词=脉冲消融) OR 题名或关键词=不可逆电穿孔) OR 题名或关键词=非热消融) AND (years:[2018 TO 2025]) | 253 |
| #3 | #1 AND #2 | 76 |
|  |  |  |
| **WanFang Data (2025/9/25)** | |  |
| No. | Query | Results |
| #1 | ((主题:(心房颤动) or 题名或关键词:(心房颤动) or 题名或关键词:(家族性心房颤动) or 题名或关键词:(心房纤颤) or 题名或关键词:(心房纤维颤动) or 题名或关键词:( 阵发性心房颤动) or 题名或关键词:(持续性心房颤动))) and 发表时间:2018-* | 52744 |
| #2 | ((主题:(脉冲电场消融) or 题名或关键词:(脉冲电场消融) or 题名或关键词:(脉冲消融) or 题名或关键词:(不可逆电穿孔) or 题名或关键词:(非热消融))) and 发表时间:2018-* | 461 |
| #3 | #1 AND #2 | 88 |

**Supplementary Table S3. Studies excluded (*n*=25) with reasons**

| **Studies excluded** | **Reasons** |
| --- | --- |
| Banai et al. 20241 | Lack of baseline data |
| Della Rocca et al. 20252 | Lack of baseline data |
| Farnir et al. 20243 | Lack of baseline data |
| La Fazia et al. 20244 | Lack of baseline data |
| La Fazia et al. 20255 | Lack of baseline data |
| Lisica Kordic et al. 20256 | Lack of baseline data |
| Lisica et al. 20227 | Lack of baseline data |
| Mohanty et al. 20248 | Lack of baseline data |
| Sebag et al. 20259 | Lack of baseline data |
| Tay Cheong Kiat et al. 202510 | Lack of baseline data |
| Weidlich et al. 202311 | Lack of baseline data |
| Zito et al. 202512 | Lack of baseline data |
| Albarran-Rincon et al. 202513 | Differences in intervention protocols |
| Boersma et al. 202514 | Differences in intervention protocols |
| Chaumont et al. 202515 | Differences in intervention protocols |
| Pannone et al. 202516 | Differences in intervention protocols |
| Turagam et al. 202417 | Differences in intervention protocols |
| Zaher et al. (2025a)18 | Differences in intervention protocols |
| Zaher et al. (2025b)19 | Differences in intervention protocols |
| Reddy et al. 202020 | Absence of primary outcome data |
| Saleemi et al. 202421 | Absence of primary outcome data |
| Reis Santos et al. 202422 | Overlap of study samples / Potential for duplicate publications |
| Turagam et al. 202423 | Overlap of study samples / Potential for duplicate publications |
| Mohanty et al. 202424 | Inconsistent patient populations |
| Moltrasio et al. 202325 | Unavailability of full-text articles |

**References**

1. Banai A, Chorin E, Schwartz AL, et al. Pulsed field ablation prevents left atrial restrictive physiology after posterior wall isolation in patients with persistent atrial fibrillation. Heart rhythm 2024;21(8):1245–7.

2. Della Rocca D, Raczka F, Sorgente A, et al. Optimizing pulmonary vein and posterior wall isolation to target adjacent sites of localized reentry during atrial fibrillation: Acute results of a novel, ultrahigh density mapping algorithm. Europace 2025;27:i550–1.

3. Farnir F, Chaldoupi S-M, Farnir F, et al. Focal point-by-point biphasic monopolar pulsed field ablation for posterior wall isolation. Europace [Internet] 2024;26(4).

4. La Fazia V, Nicola Pierucci NP, Paolo Compagnucci PC, et al. Organization of atrial flutter during pulse field ablation for atrial fibrillation. Eur Heart J [Internet] 2024;45.

5. La Fazia V, Nicola Pierucci NP, Paolo Compagnucci PC, et al. Organization of atrial fibrillation during pulsed field ablation. Europace 2025;27:i732–4.

6. Lisica Kordic L, Jurisic Z, Breskovic T, Sikiric I, Katic J, Anic A. Chronic remap findings post left atrial posterior wall ablation with the pentaspline pulsed field ablation platform. Europace 2025;27:i195–6.

7. Lisica L, Sikiric I, Katic J, et al. Additional left atrial posterior wall ablation using pulsed field ablation as a safe and feasible treatment option for persistent atrial fibrillation patients. Europace 2022;24(SUPPL 1):i125.

8. Mohanty S, Casella M, Doty B, et al. Ablation outcome in patients with atrial fibrillation undergoing ICE-guided pulsed-field ablation. Eur Heart J [Internet] 2024;45.

9. Sebag F, Roeun SR, Simeon ES, et al. Atrial fibrillation ablation using variable loop pulse field ablation in the real world: An observational study. Europace 2025;27:i592.

10. Tay Cheong Kiat J, Chua YY, Tarranza JL, et al. Characteristics and outcomes of patients undergoing extra-pulmonary vein ablation using pulsed field ablation for atrial fibrillation. Europace 2025;27:i659.

11. Weidlich S, Schweigler A, Serban T, et al. Left atrial posterior wall isolation using pulsed-field ablation: Procedural characteristics, safety, myocardial injury and short-term outcomes. Eur Heart J [Internet] 2023;44.

12. Zito E, Bianchini L, Schiavone M, et al. Midterm outcomes of staged hybrid convergent procedure versus PVI andPWpulsed field ablation in long standing persistent AF patients. Europace 2025;27:i233.

13. Albarran-Rincon R, Larrea Inarra A, Merejo Pena C, et al. Impact of left atrial posterior wall ablation using pulse field energy on persistent atrial fibrillation. Europace 2025;27:i816–7.

14. Boersma LVA, Szeplaki G, Garcia-Bolao I, et al. Does extent of lesion set using pulsed field ablation impact the safety of de novo ablation procedures? Sub-analysis of the FARADISE registry. Europace 2025;27:i716.

15. Chaumont C, Laredo M, Thomas O, et al. Countrywide introduction of pulsed field ablation for the treatment of atrial fibrillation: Acute results from the FRANCE-PFA registry. Heart Rhythm O2 2025;6(7):911–9.

16. Pannone L, Doundoulakis I, Della Rocca DG, et al. Pentaspline catheter or cryoballoon for pulmonary vein plus posterior wall isolation in persistent atrial fibrillation: 1-year outcomes. Heart Rhythm [Internet] 2025.

17. Turagam MK, Neuzil P, Petru J, et al. AF ablation using a novel “single-shot” map-and-ablate spherical array pulsed field ablation catheter: 1-year outcomes of the first-in-human PULSE-EU trial. Heart Rhythm 2024;21(8):1218–26.

18. Zaher W, Della Rocca DG, Marcon L, et al. Multielectrode catheter-based pulsed field ablation for persistent atrial fibrillation: Safety, 1-year efficacy and impact on left atrial function of ablation protocols beyond pulmonary vein isolation. Europace 2025;27:i793–4.

19. Zaher W, Marcon L, Della Rocca DG, et al. Pulsed-field ablation beyond pulmonary vein for persistent atrial fibrillation: Efficacy and impact on left atrial function. J Interv Card Electrophysiol [Internet] 2025 ;Available from: https://link.springer.com/10.1007/s10840-025-02080-1

20. Reddy VY, Anic A, Koruth J, et al. Pulsed Field Ablation in Patients With Persistent Atrial Fibrillation. JOURNAL OF THE AMERICAN COLLEGE OF CARDIOLOGY 2020;76(9):1068–80.

21. Saleemi S, Dashwood A, Kader Z, et al. Comparative analysis of pulmonary vein isolation (PVI) alone versus PVI with additional left atrial posterior wall isolation by pulsed field ablation: A single-centre study. Heart Lung Circul 2024;33:S425.

22. Reis Santos R, Bello AR, Santos PG, et al. Safety and effectiveness of pulsed field ablation for pulmonary vein isolation in atrial fibrillation patients: A single centre experience. Eur Heart J [Internet] 2024;45.

23. Turagam M. Impact of Left Atrial Posterior Wall Ablation During Pulsed Field Ablation for Persistent Atrial Fibrillation: A MANIFEST-PF Registry Sub-Study. JOURNAL OF CARDIOVASCULAR ELECTROPHYSIOLOGY 2024;35(6):1251–2.

24. Mohanty S, Doty B, Casella M, et al. Ablation outcome in elderlywomenwith atrial fibrillation undergoing pulsed-field ablation for electrical isolation of pulmonary veins and left atrial posterior wall. Eur Heart J [Internet] 2024;45.

25. Moltrasio M, Fassini G, Riva S, et al. Pulsed Field Ablation Technology for Pulmonary Vein and Left Atrial Posterior-Wall Isolation in Patients With Atrial Fibrillation: Preliminary Experience From An Experienced Ablation Center. JOURNAL OF CARDIOVASCULAR ELECTROPHYSIOLOGY 2023;34(4):1081–2.

**Supplementary Table S4. Quality Assessment**

| **JBI Critical Appraisal Checklist For Cohort Studies** | | | | | | | | | | | | | |
| --- | --- | --- | --- | --- | --- | --- | --- | --- | --- | --- | --- | --- | --- |
| **Study** | ***Q1*** | ***Q2*** | ***Q3*** | ***Q4*** | ***Q5*** | ***Q6*** | ***Q7*** | ***Q8*** | ***Q9*** | ***Q10*** | ***Q11*** |
| Gunawardene et al. 2023 | N | Y | Y | Y | U | Y | Y | Y | Y | NA | Y |
| Hirokami et al. 2025 | Y | Y | Y | Y | Y | Y | Y | Y | Y | NA | Y |
| Reis Santos et al. 2025 | Y | Y | Y | N | U | Y | Y | Y | U | NA | Y |
| Schiavone et al. 2024 | Y | Y | Y | Y | N | Y | Y | Y | U | NA | Y |
| Tay et al. 2024 | N | Y | Y | Y | N | Y | Y | Y | Y | U | Y |
| Turagam et al. 2024 | Y | Y | Y | Y | Y | Y | Y | Y | Y | NA | Y |
| Y: Yes; N: No; U: Unclear; NA: Not applicable | | | | | | | | | | | | | |
| Q1. Were the two groups similar and recruited from the same population? | | | | | | | | | | | | |  |
| Q2. Were the exposures measured similarly to assign people to both exposed and unexposed groups? | | | | | | | | | | | | |  |
| Q3. Was the exposure measured in a valid and reliable way? | | | | | | | | | | | | |  |
| Q4. Were confounding factors identified? | | | | | | | | | | | | |  |
| Q5. Were strategies to deal with confounding factors stated? | | | | | | | | | | | | |  |
| Q6. Were the groups/participants free of the outcome at the start of the study (or at the moment of exposure)? | | | | | | | | | | | | |  |
| Q7. Were the outcomes measured in a valid and reliable way? | | | | | | | | | | | | |  |
| Q8. Was the follow up time reported and sufficient to be long enough for outcomes to occur? | | | | | | | | | | | | |  |
| Q9. Was follow up complete, and if not, were the reasons to loss to follow up described and explored? | | | | | | | | | | | | |  |
| Q10. Were strategies to address incomplete follow up utilized? | | | | | | | | | | | | |  |
| Q11. Was appropriate statistical analysis used? | | | | | | | | | | | | |  |

| **JBI Critical Appraisal Checklist For Single-Arm Cohort Studies** | | | | | | | | | | | | | |
| --- | --- | --- | --- | --- | --- | --- | --- | --- | --- | --- | --- | --- | --- |
| **Study** | ***Q1*** | ***Q2*** | ***Q3*** | ***Q4*** | ***Q5*** | ***Q6*** | ***Q7*** | ***Q8*** | ***Q9*** | ***Q10*** |  |
| Badertscher et al. 2024 | Y | Y | Y | Y | Y | Y | Y | Y | Y | Y |  |
| Chorin et al. 2025 | Y | Y | Y | Y | Y | Y | Y | Y | Y | Y |  |
| Gunawardene et al. 2025 | Y | Y | Y | Y | Y | Y | Y | Y | Y | Y |  |
| Kordic et al. 2024 | Y | Y | Y | Y | Y | Y | Y | Y | Y | Y |  |
| Kueffer et al. 2023 | Y | Y | Y | Y | Y | Y | Y | Y | Y | Y |  |
| Reddy et al. 2025a | Y | Y | Y | Y | Y | Y | Y | Y | Y | Y |  |
| Reddy et al. 2025b | Y | Y | Y | Y | Y | Y | Y | Y | Y | Y |  |
| Y: Yes; N: No; U: Unclear; NA: Not applicable | | | | | | | | | | | | | |
| Q1. Were there clear criteria for inclusion in the case series? | | | | | | | | | | | | |  |
| Q2. Was the condition measured in a standard, reliable way for all participants included in the case series? | | | | | | | | | | | | |  |
| Q3. Were valid methods used for identification of the condition for all participants included in the case series? | | | | | | | | | | | | |  |
| Q4. Did the case series have consecutive inclusion of participants? | | | | | | | | | | | | |  |
| Q5. Did the case series have complete inclusion of participants? | | | | | | | | | | | | |  |
| Q6. Was there clear reporting of the demographics of the participants in the study? | | | | | | | | | | | | |  |
| Q7. Was there clear reporting of clinical information of the participants? | | | | | | | | | | | | |  |
| Q8. Were the outcomes or follow up results of cases clearly reported? | | | | | | | | | | | | |  |
| Q9. Was there clear reporting of the presenting site(s)/clinic(s) demographic information? | | | | | | | | | | | | |  |
| Q10. Was statistical analysis appropriate? | | | | | | | | | | | | |  |

**Supplementary Figure S1. Funnel Plot for Atrial Tachyarrhythmia Recurrence**

**
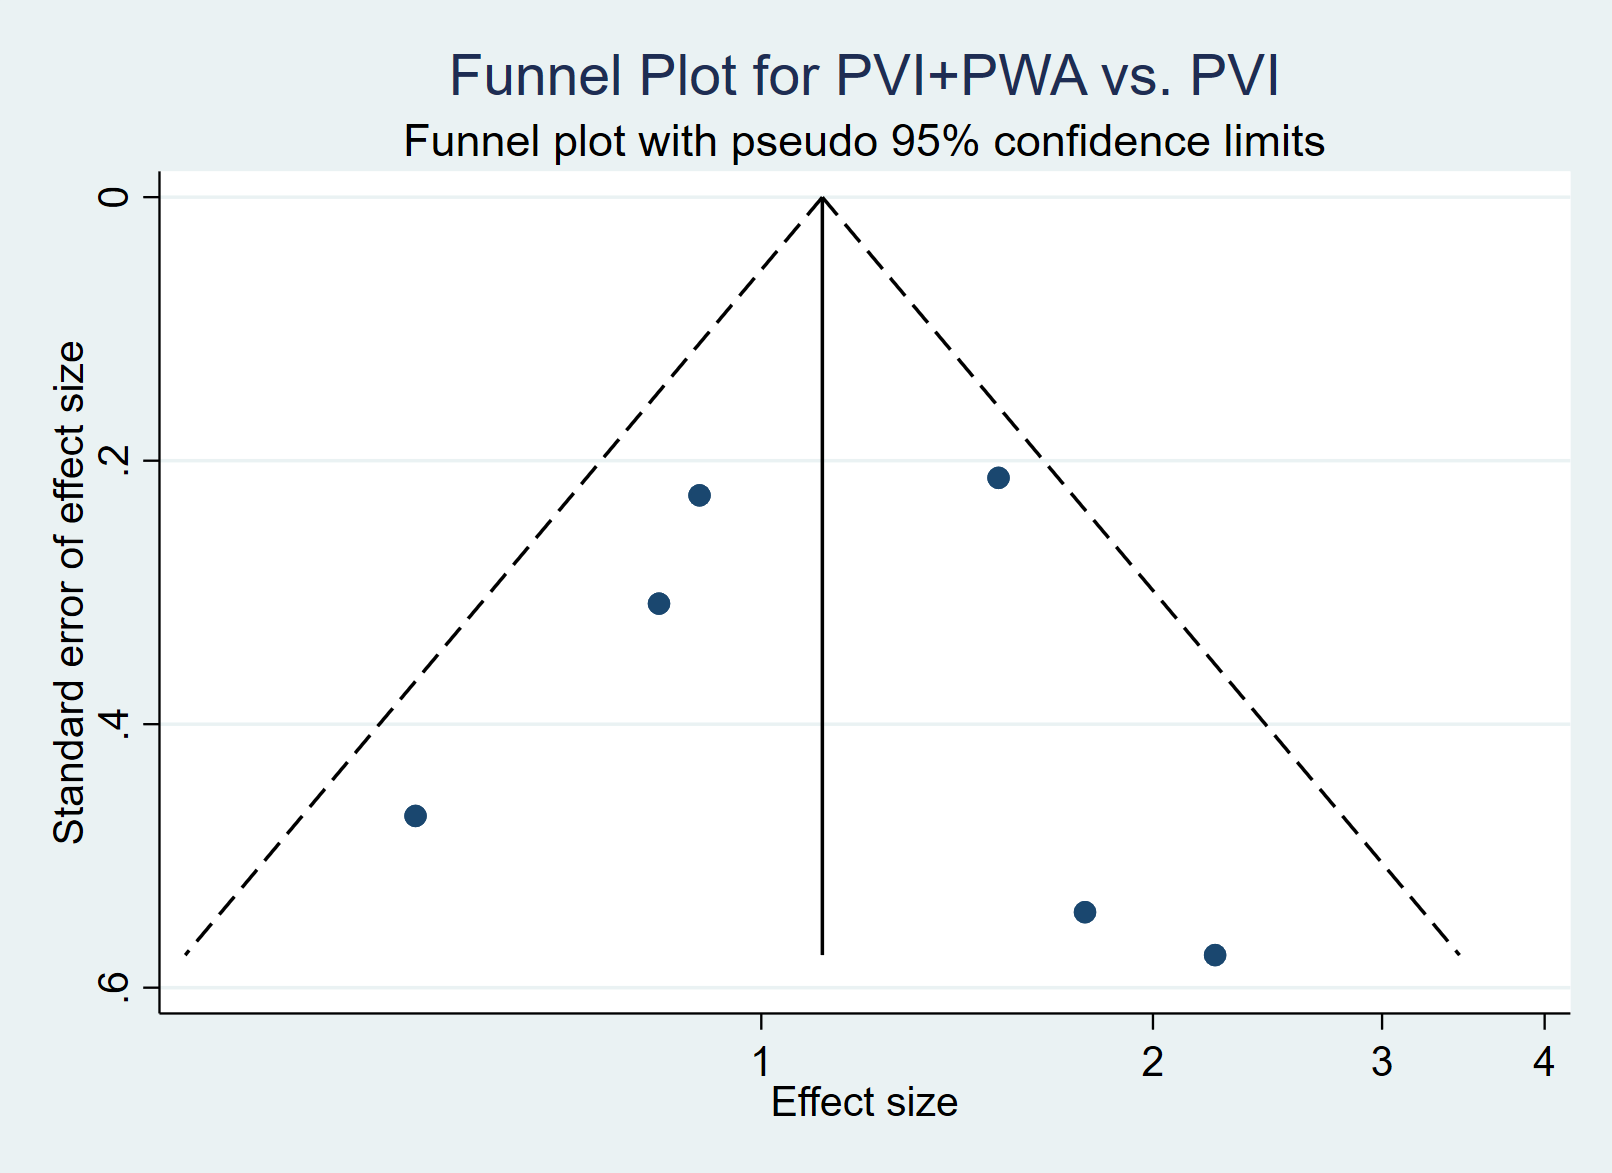
**

**Supplementary Figure S2. Egger's Test for Publication Bias**

**
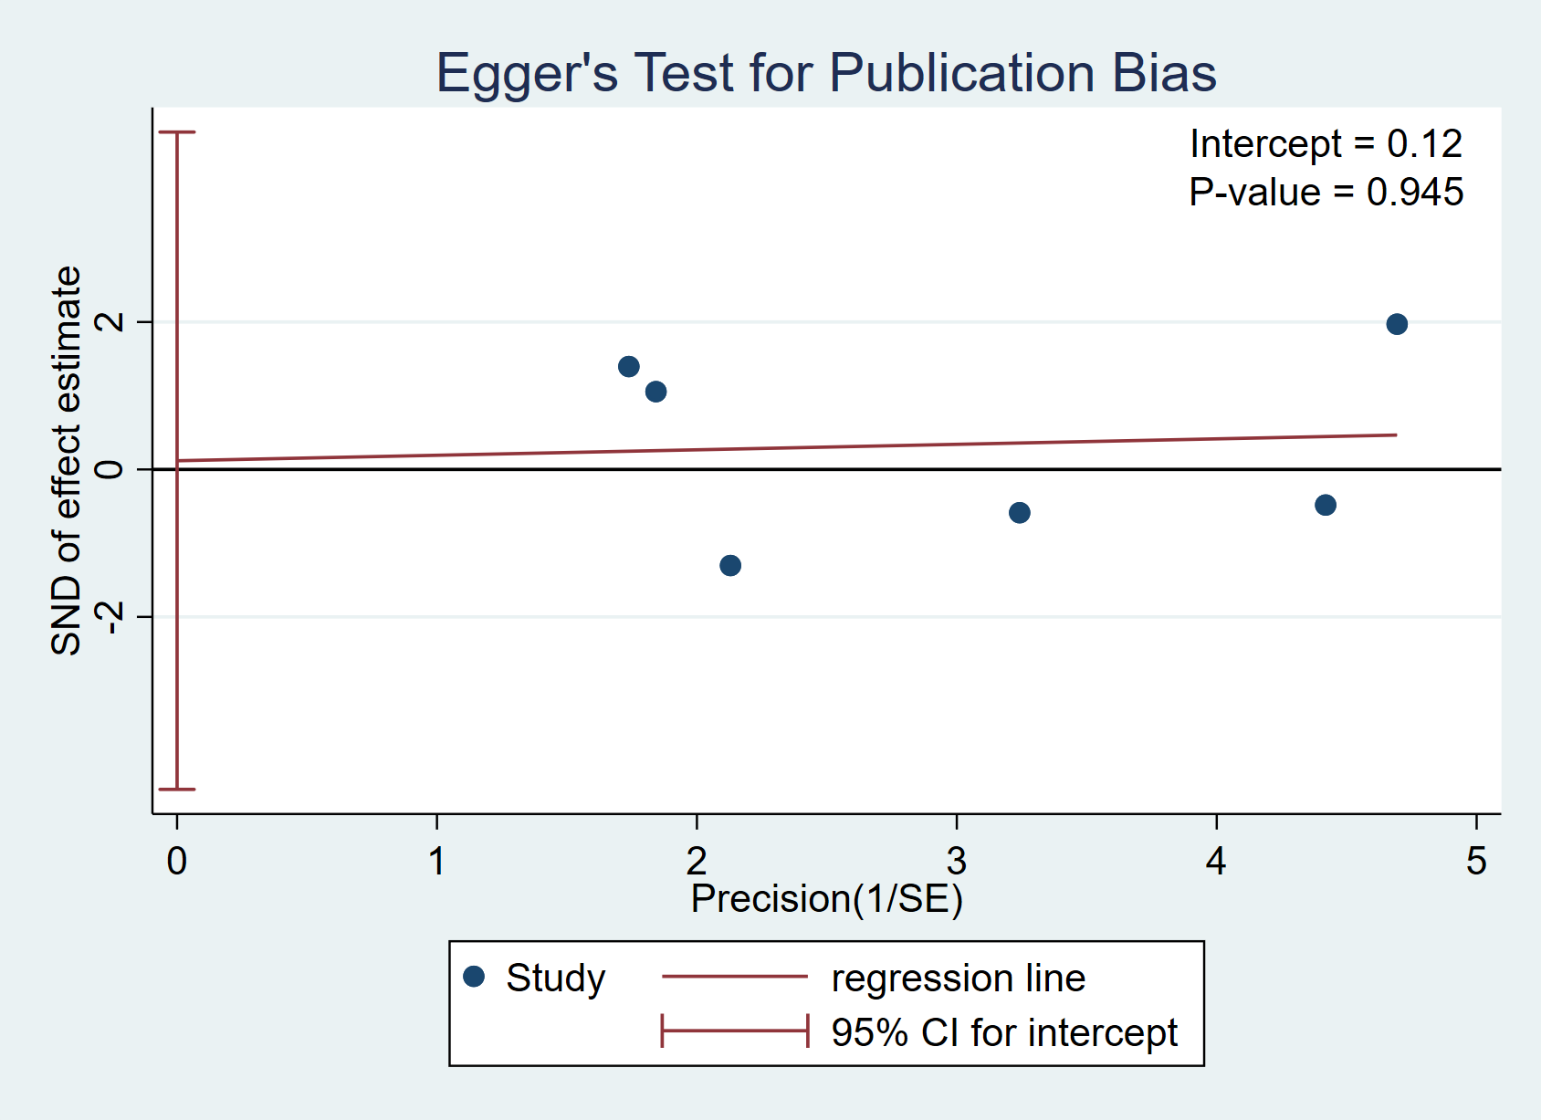
**

**Supplementary Figure S3. Galbraith Plot for ATA Recurrence**

**
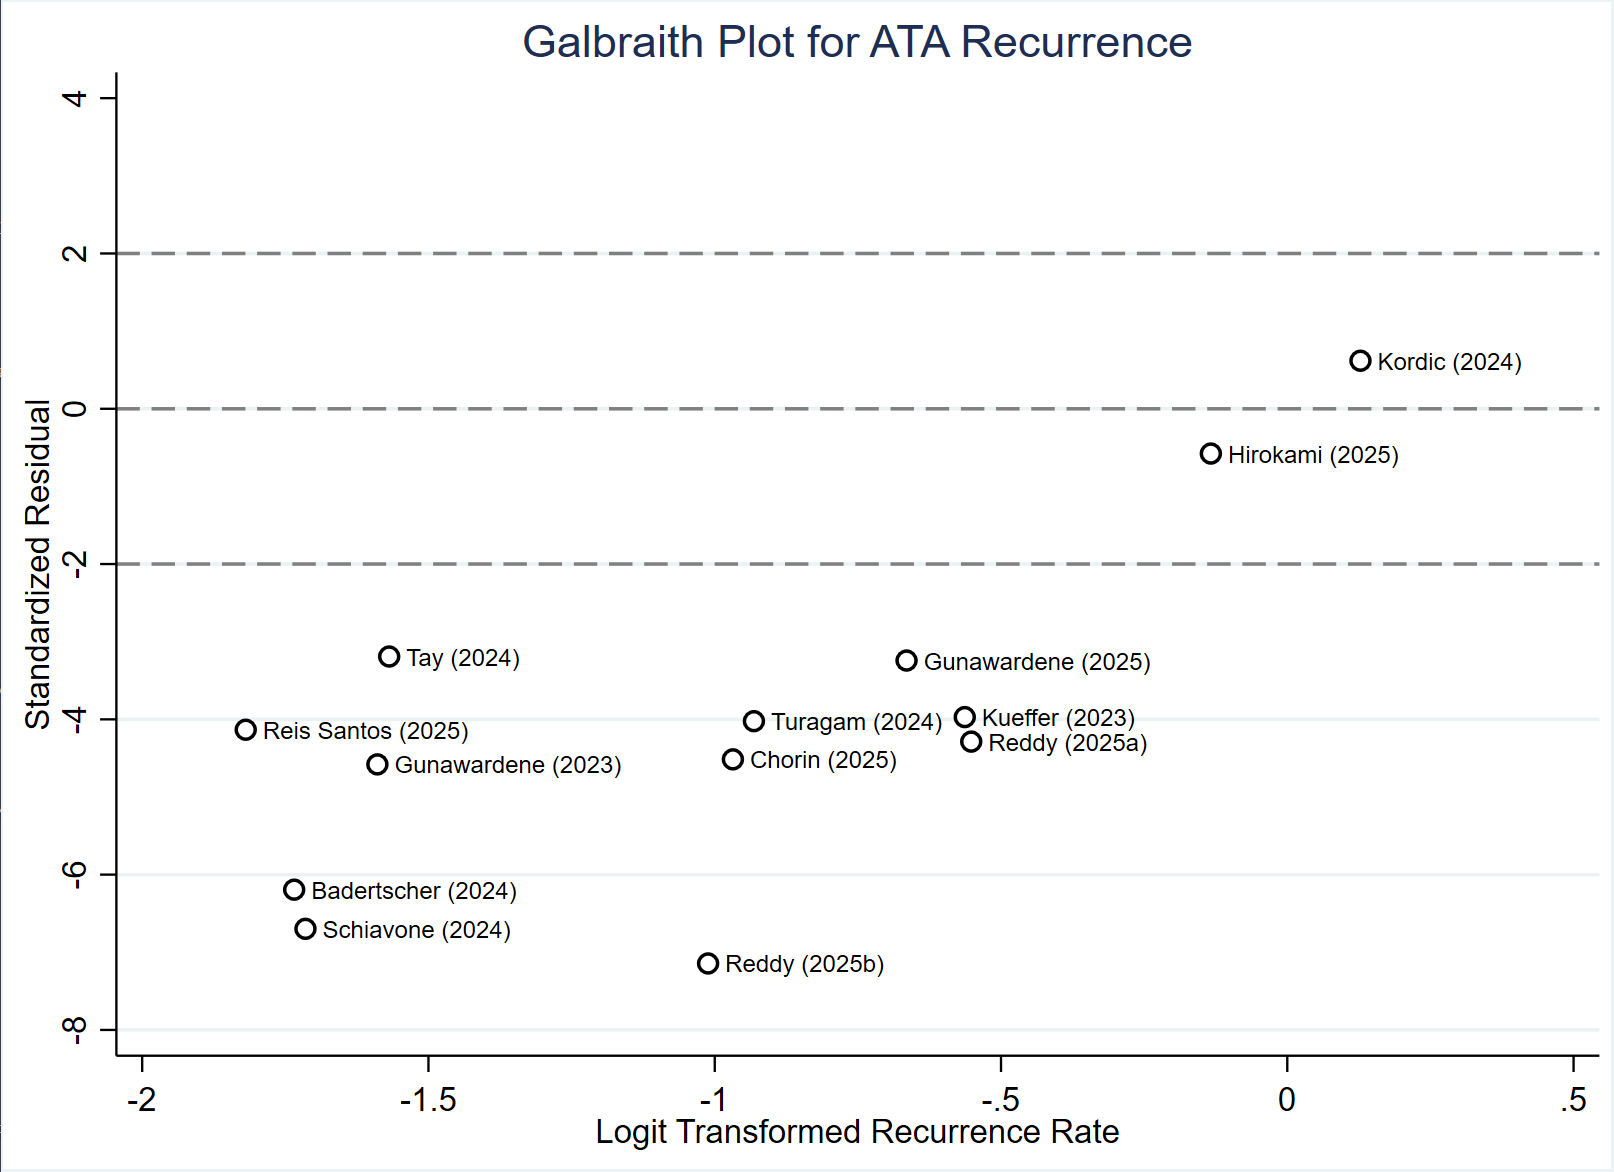
**

**Supplementary Figure S4. Subgroup Analysis Forest Plots: Atrial Arrhythmia Recurrence After PVI+PWI Strategy in 13 Studies**


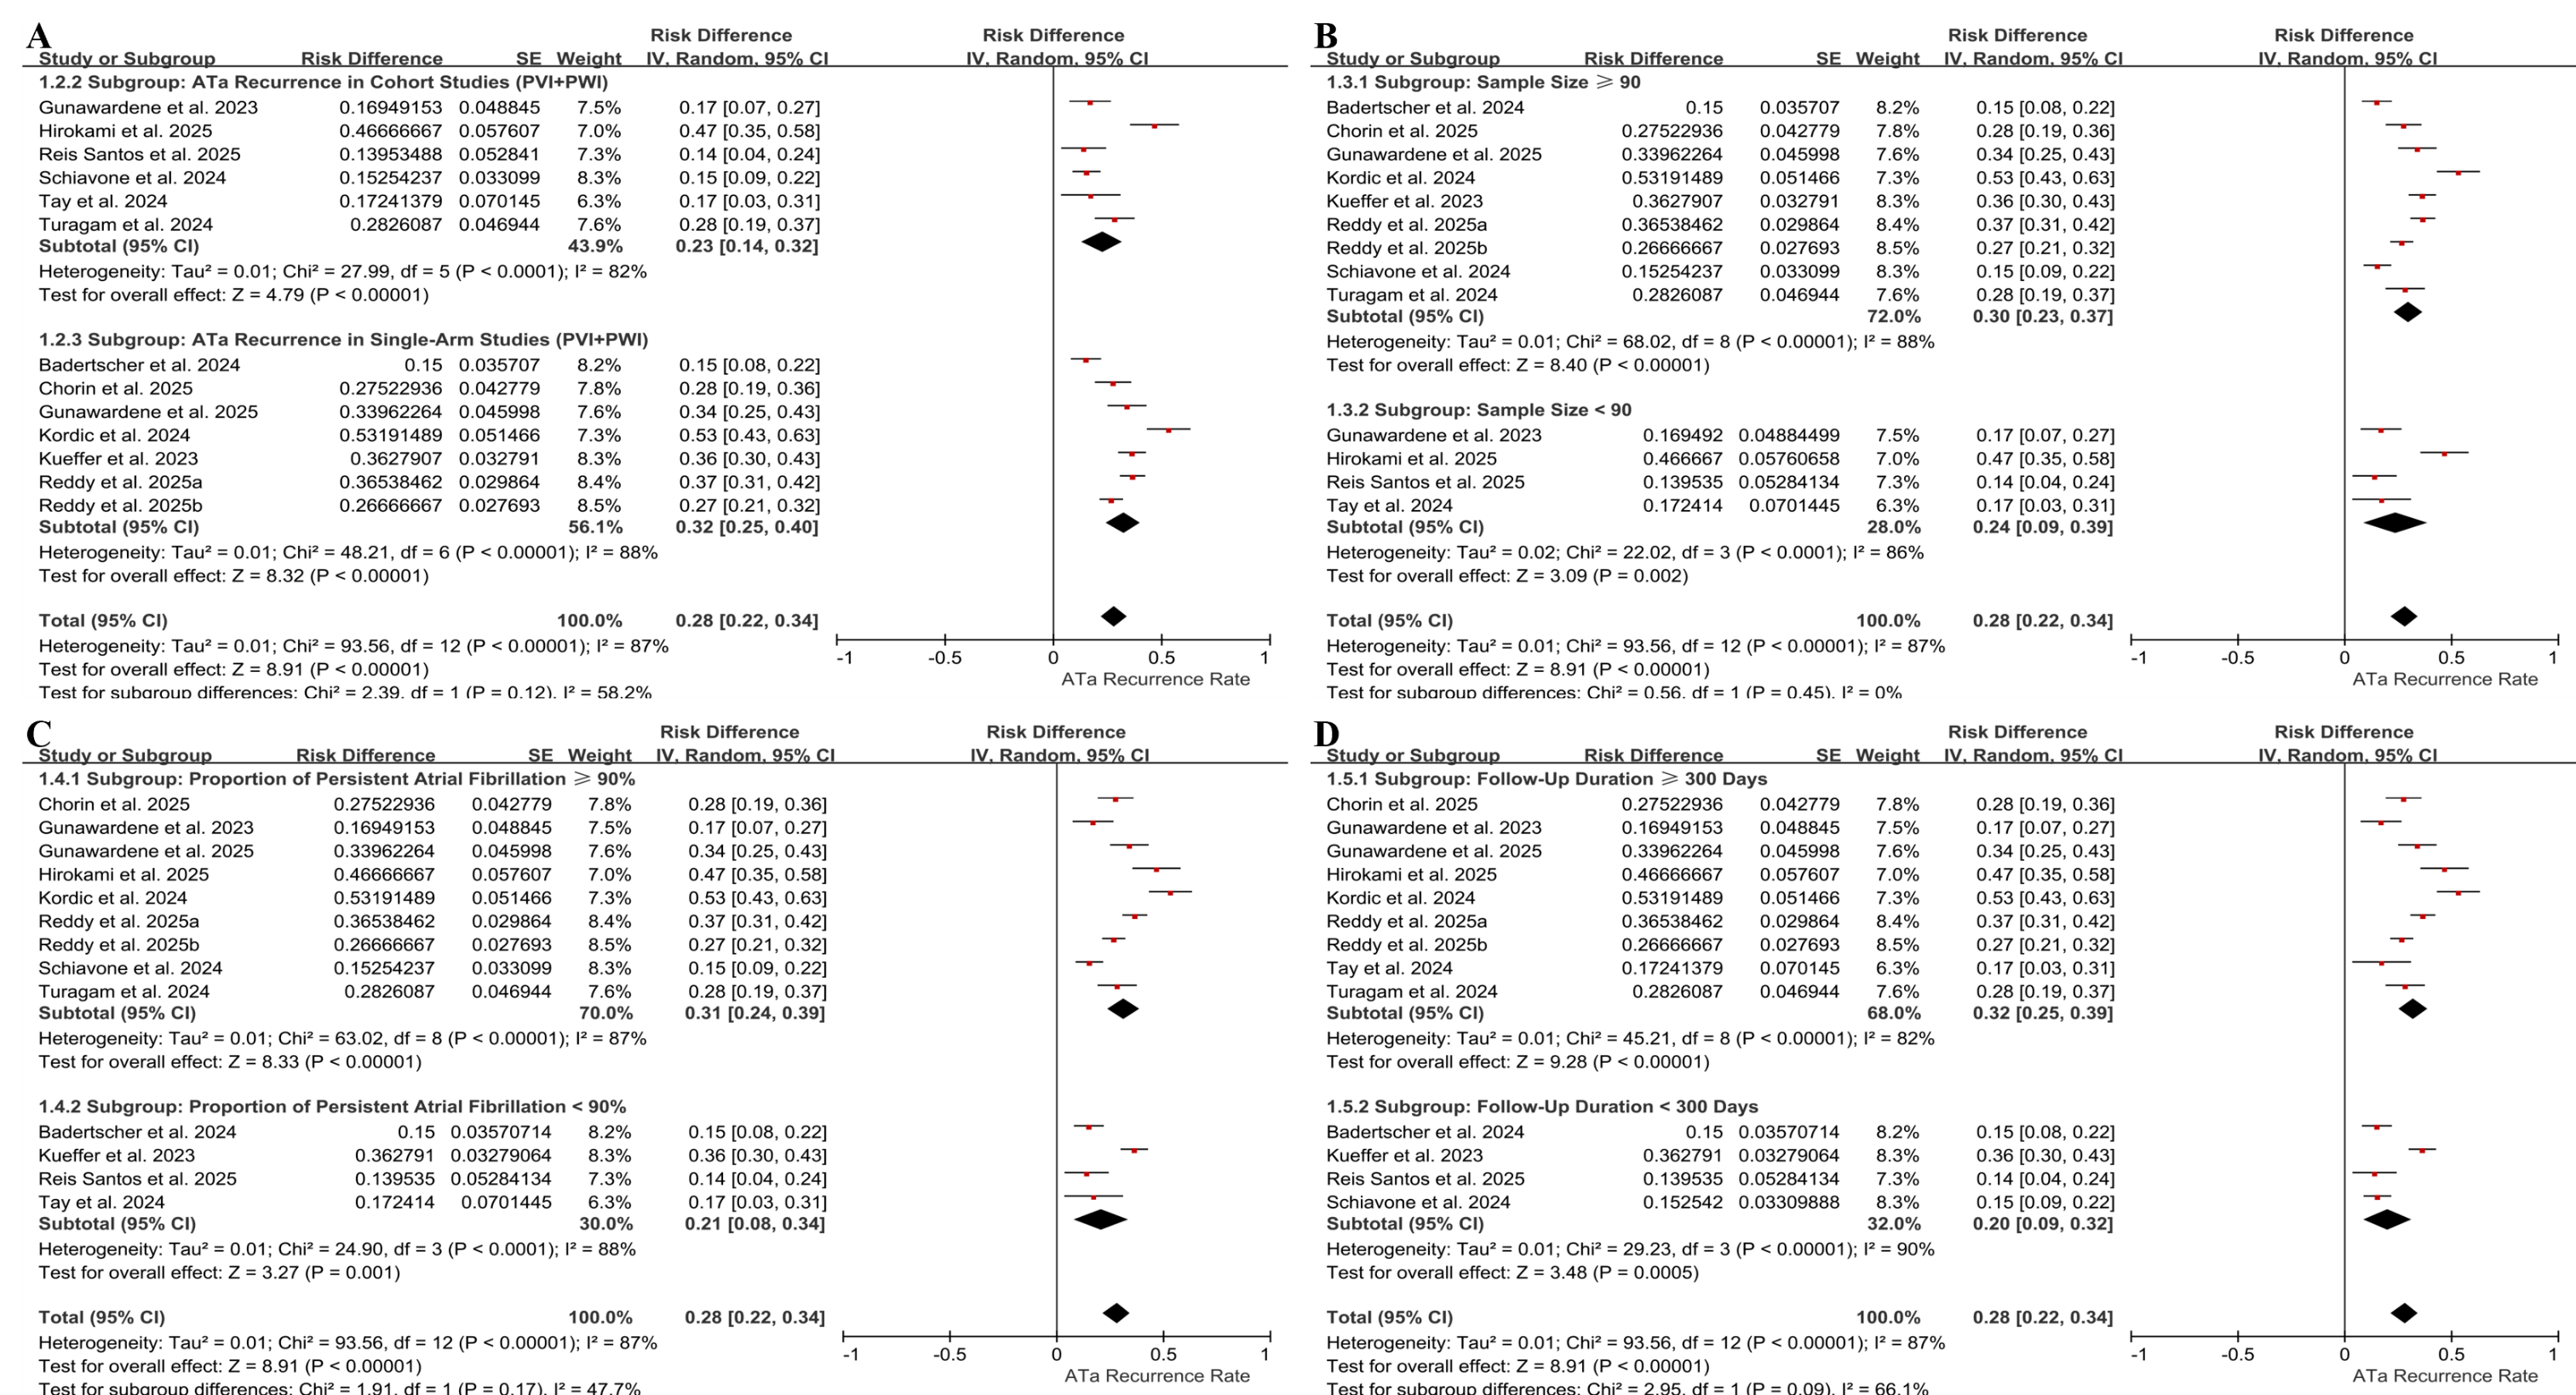


Note: A. By study type; B. By sample size; C. By atrial fibrillation type; D. By follow-up duration. Abbreviations: ATa, atrial tachyarrhythmia; CI, Confidence Interval; PVI, Pulmonary Vein Isolation; PWI, Posterior Wall Isolation; SD, Standard Deviation.

**Supplementary Table S5. The heterogeneity of the included studies through sensitivity analysis -** **Procedural Characteristics**

1. **Sensitivity analysis - Used 3D Mapping**

| **Trials** | **MD (95% CI)** | ***I*2 (%)** | ***p* value** |
| --- | --- | --- | --- |
| Final outcome | 1.47 [1.03, 2.10] | 95 | 0.03 |
| Trials excluded |  |  |  |
| Gunawardene et al. 2023 | 1.58 [1.16, 2.16] | 87 | 0.004 |
| Hirokami et al. 2025 | 1.41 [0.98, 2.02] | 95 | 0.06 |
| Reis Santos et al. 2025 | 1.47 [0.96, 2.26] | 96 | 0.08 |
| Schiavone et al. 2024 | 1.29 [0.99, 1.67] | 92 | 0.06 |
| Tay et al. 2024 | 1.57 [0.90, 2.75] | 97 | 0.11 |
| Turagam et al. 2024 | 1.59 [0.99, 2.56] | 97 | 0.06 |

1. **Sensitivity analysis - Procedure duration (min)**

| **Trials** | **MD (95% CI)** | ***I*2 (%)** | ***p* value** |
| --- | --- | --- | --- |
| Final outcome | 16.22 [0.35, 32.08] | 88 | 0.05 |
| Trials excluded |  |  |  |
| Gunawardene et al. 2023 | 16.47 [-2.22, 35.15] | 91 | 0.08 |
| Hirokami et al. 2025 | 11.66 [-3.30, 26.61] | 83 | 0.13 |
| Reis Santos et al. 2025 | 11.88 [-4.29, 28.04] | 87 | 0.15 |
| Schiavone et al. 2024 | 19.72 [2.16, 37.28] | 85 | 0.03 |
| Tay et al. 2024 | 16.86 [-1.32, 35.04] | 91 | 0.07 |
| Turagam et al. 2024 | 20.64 [2.89, 38.40] | 89 | 0.02 |

1. **Sensitivity analysis - Fluoroscopy time (min)**

| **Trials** | **MD (95% CI)** | ***I*2 (%)** | ***p* value** |
| --- | --- | --- | --- |
| Final outcome | 1.15 [-2.58, 4.89] | 88 | 0.55 |
| Trials excluded |  |  |  |
| Gunawardene et al. 2023 | 1.37 [-3.04, 5.78] | 90 | 0.54 |
| Hirokami et al. 2025 | -0.26 [-3.28, 2.76] | 77 | 0.87 |
| Reis Santos et al. 2025 | 0.39 [-3.81, 4.59] | 89 | 0.86 |
| Schiavone et al. 2024 | 1.51 [-3.27, 6.30] | 89 | 0.54 |
| Tay et al. 2024 | 1.48 [-2.90, 5.86] | 90 | 0.51 |
| Turagam et al. 2024 | 2.40 [-1.22, 6.01] | 84 | 0.19 |
